# Supplementary material for: Synthesis of the trisaccharide moiety and a cholesteryl analog of phyteumosides
Source: Royal Society of Chemistry journal article supplement (doi:10.1039/c3ra47523a), 2014-01-01

## Supporting Information

### Synthesis of the Trisaccharide Moiety and a Cholesteryl Analog of Phyteumosides

Sanjoy Adak, Madhu Emmadi and Suvarn S. Kulkarni\*

*Department of Chemistry, Indian Institute of Technology Bombay, Mumbai 400076, India.*

*E-mail: [suvarn@chem.iitb.ac.in](mailto:suvarn@chem.iitb.ac.in)*

| Table of Contents                                                        | Pages |
|--------------------------------------------------------------------------|-------|
| <sup>1</sup> H NMR spectrum of compound <b>7</b> .....                   | S2    |
| <sup>13</sup> C NMR spectrum of compound <b>7</b> .....                  | S3    |
| <sup>1</sup> H NMR spectrum of compound <b>8a</b> .....                  | S4    |
| <sup>13</sup> C NMR spectrum of compound <b>8a</b> .....                 | S5    |
| <sup>1</sup> H NMR spectrum of compound <b>8b</b> .....                  | S6    |
| <sup>1</sup> H- <sup>1</sup> H Cosy spectrum of compound <b>8b</b> ..... | S7    |
| <sup>13</sup> C NMR spectrum of compound <b>8b</b> .....                 | S8    |
| <sup>1</sup> H NMR spectrum of compound <b>2</b> .....                   | S9    |
| <sup>13</sup> C NMR spectrum of compound <b>2</b> .....                  | S10   |
| <sup>1</sup> H NMR spectrum of compound <b>9</b> .....                   | S11   |
| <sup>13</sup> C NMR spectrum of compound <b>9</b> .....                  | S12   |
| <sup>1</sup> H NMR spectrum of compound <b>10</b> .....                  | S13   |
| <sup>13</sup> C NMR spectrum of compound <b>10</b> .....                 | S14   |
| <sup>1</sup> H NMR spectrum of compound <b>11</b> .....                  | S15   |
| <sup>13</sup> C NMR spectrum of compound <b>11</b> .....                 | S16   |
| <sup>1</sup> H NMR spectrum of compound <b>12</b> .....                  | S17   |
| <sup>13</sup> C NMR spectrum of compound <b>12</b> .....                 | S18   |
| <sup>1</sup> H NMR spectrum of compound <b>1c</b> .....                  | S19   |
| <sup>13</sup> C NMR spectrum of compound <b>1c</b> .....                 | S20   |
| HRMS spectrum of compound <b>1c</b> .....                                | S21   |

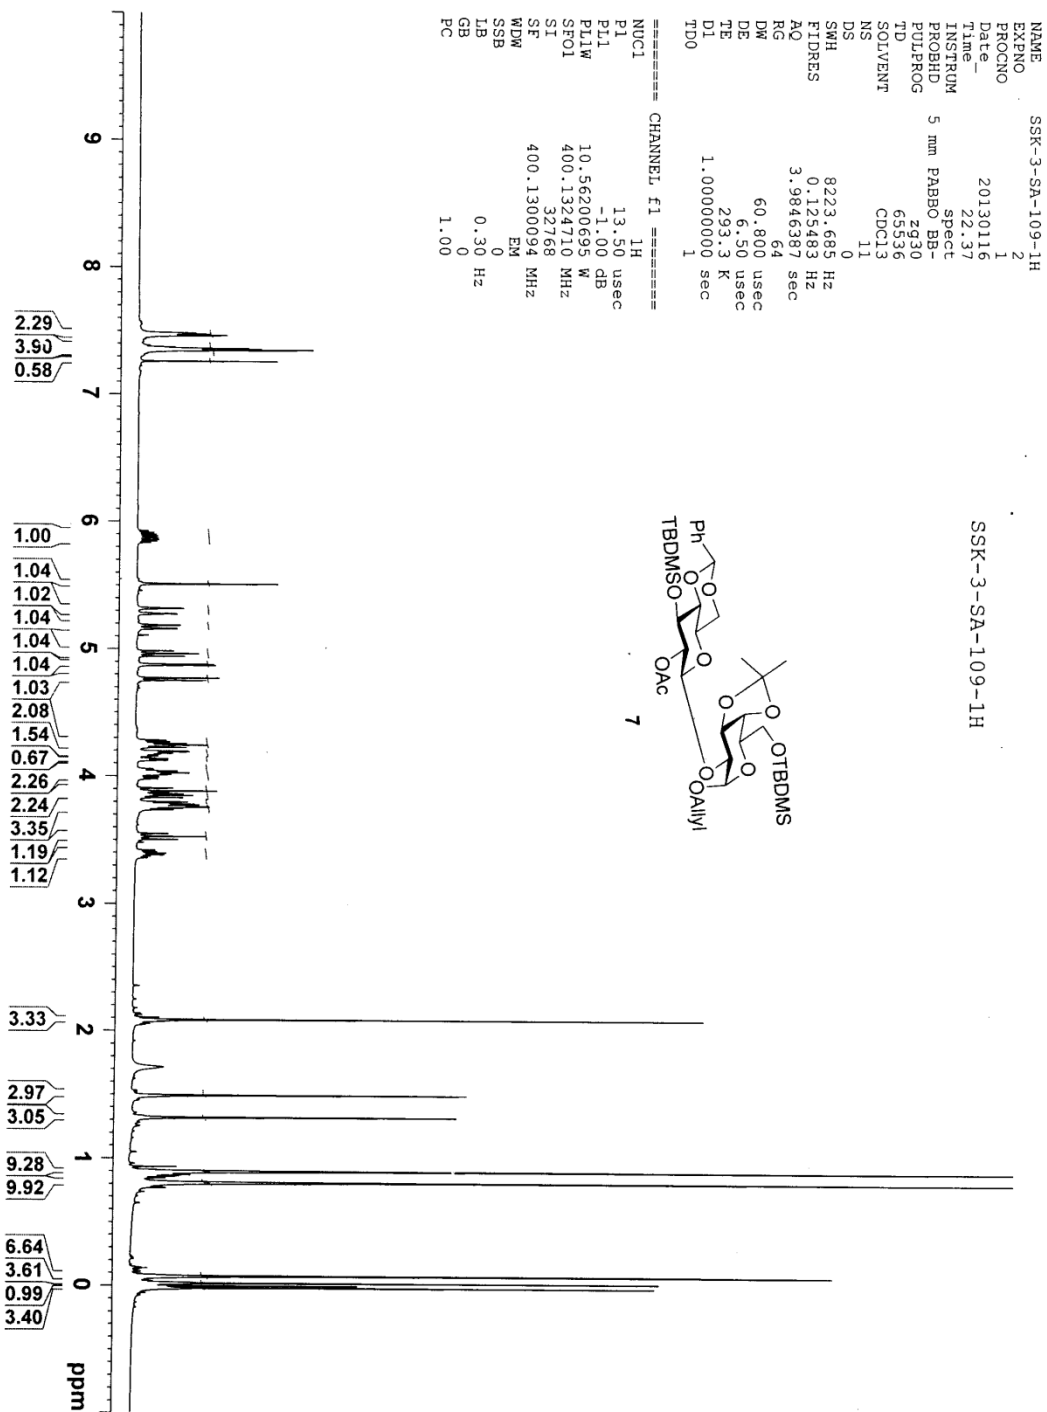

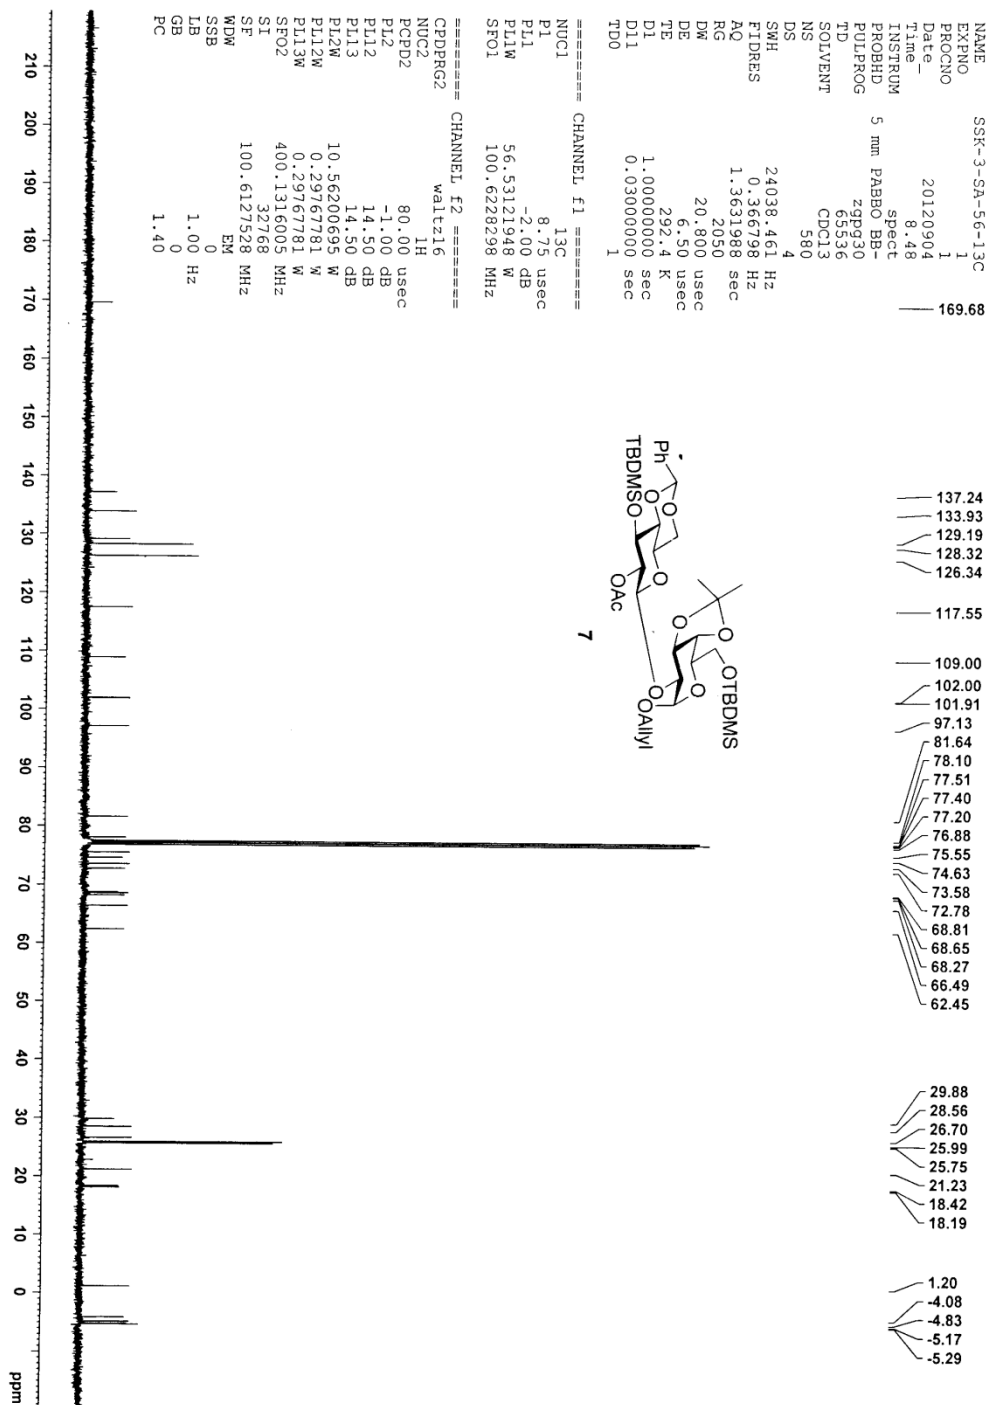

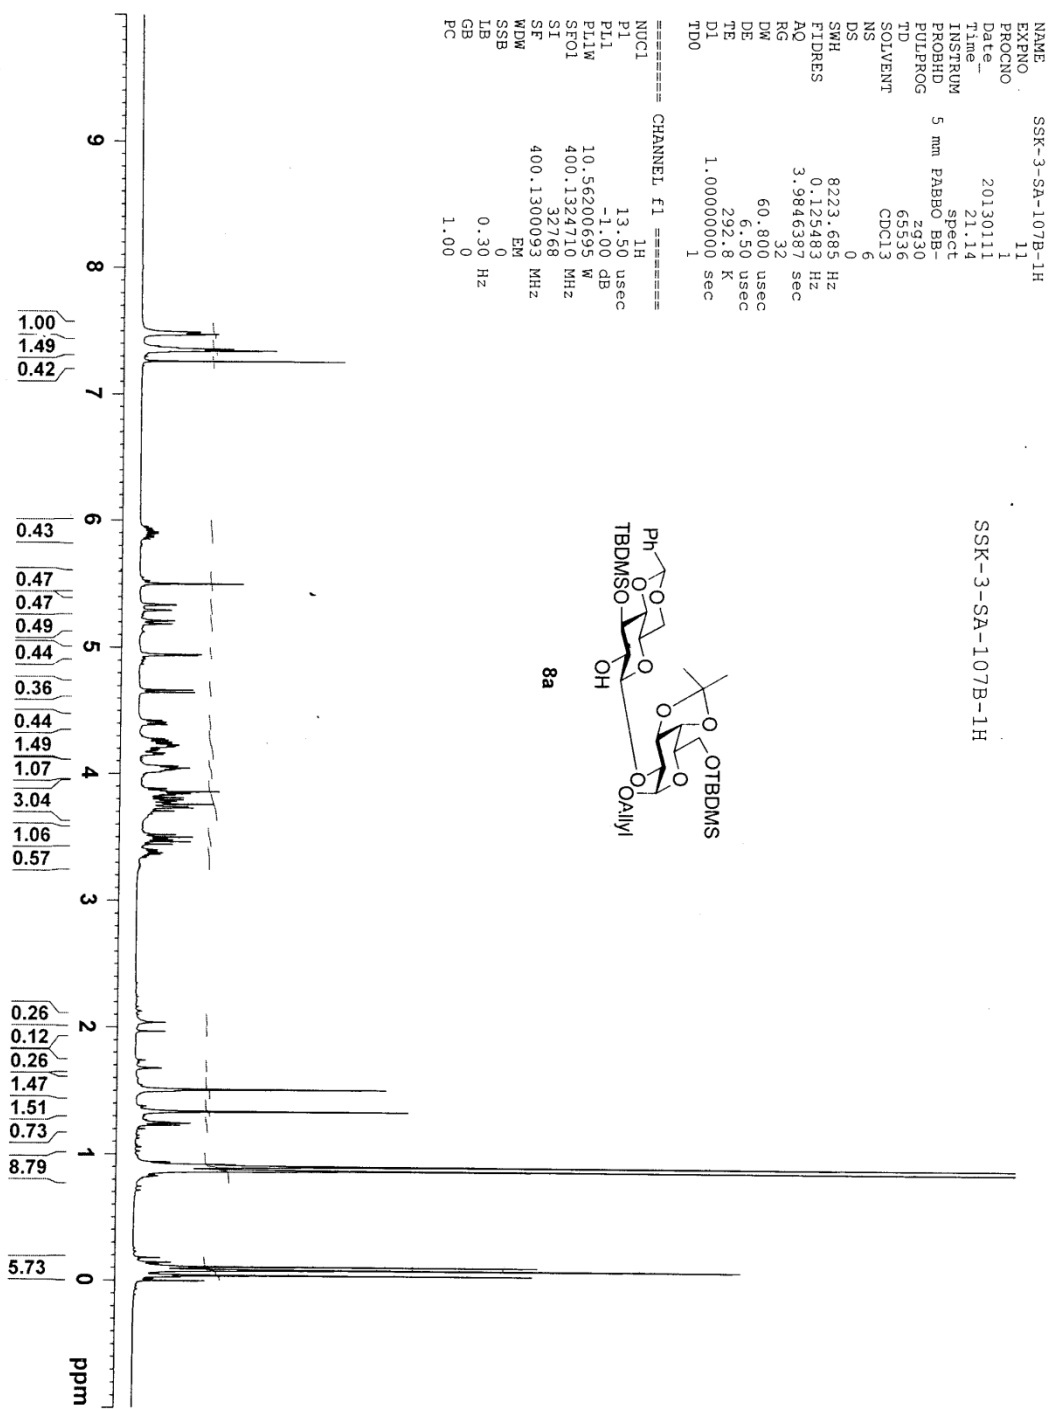

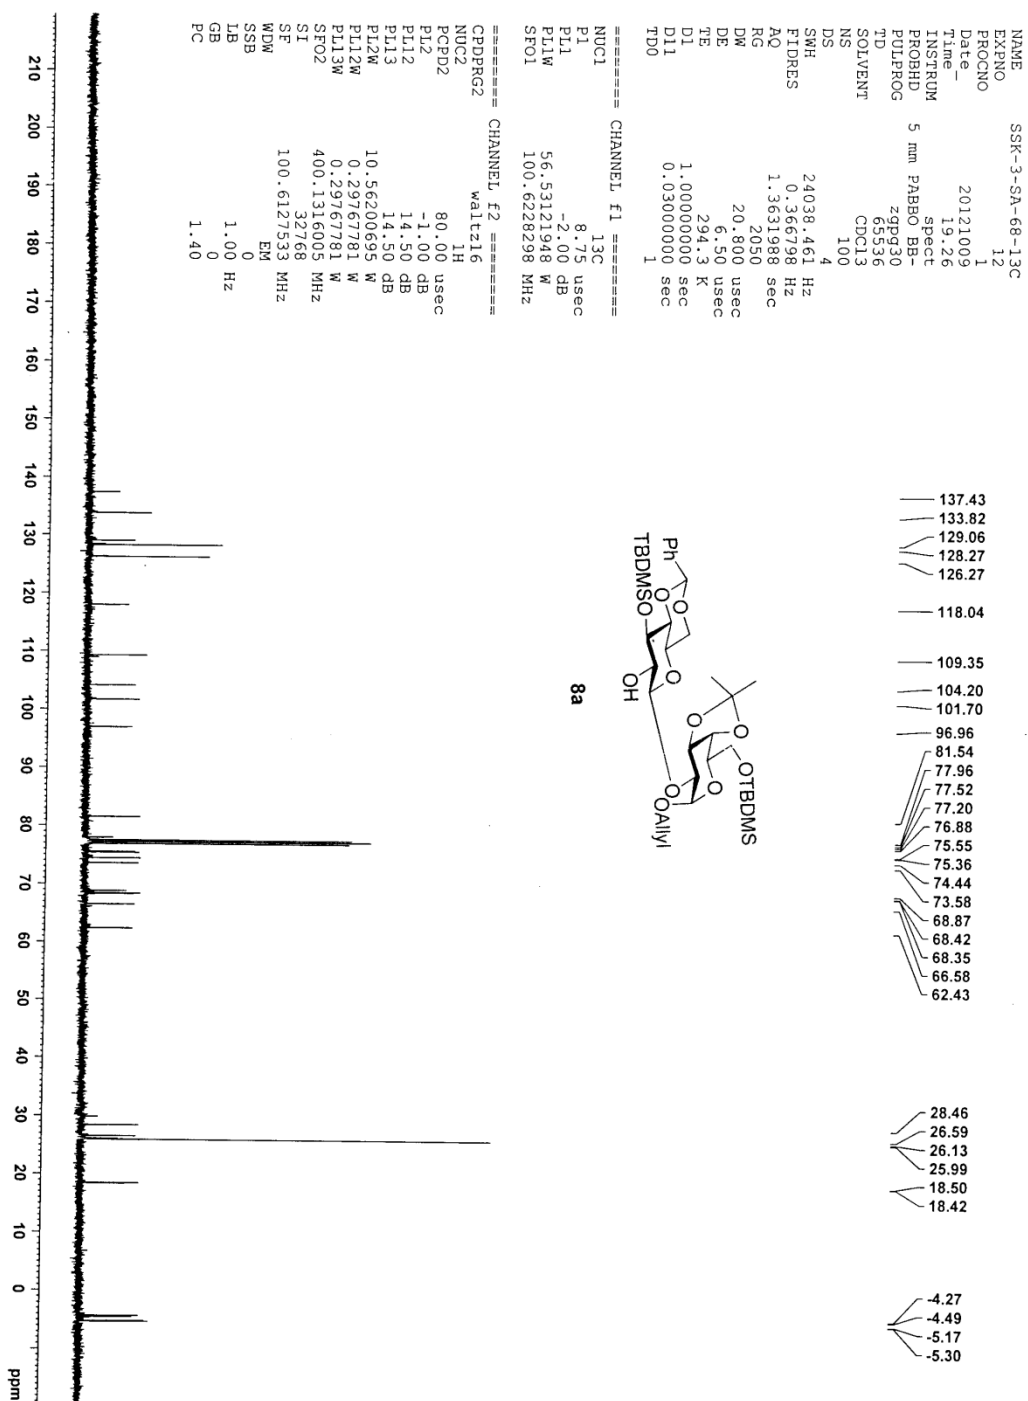

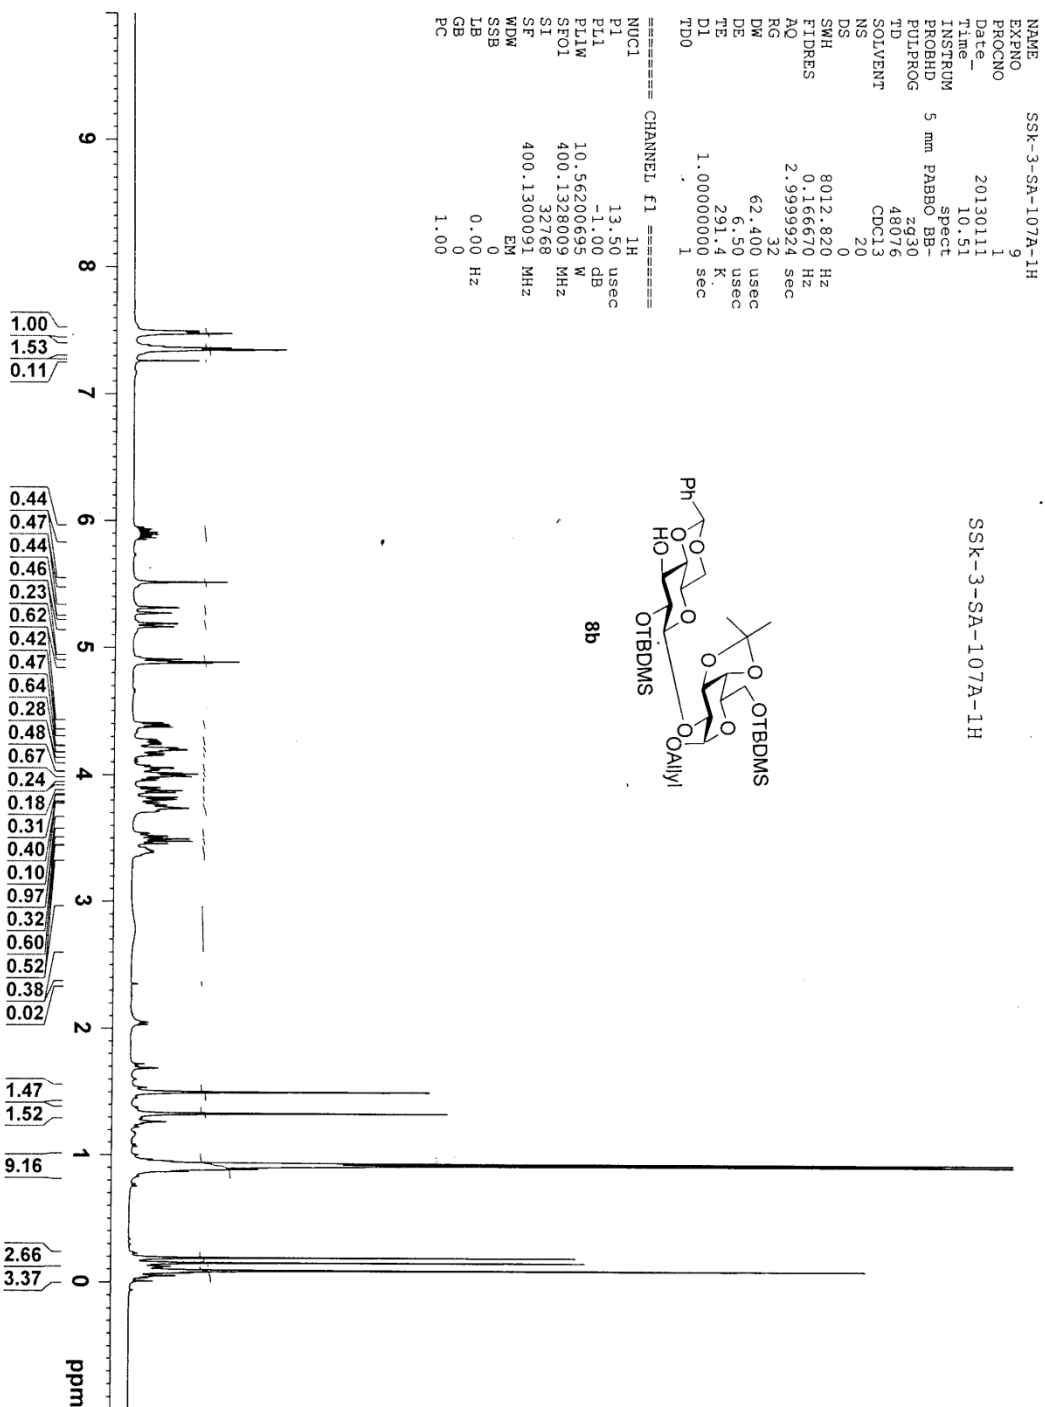

SSK-3-SA-3-OH-COSY

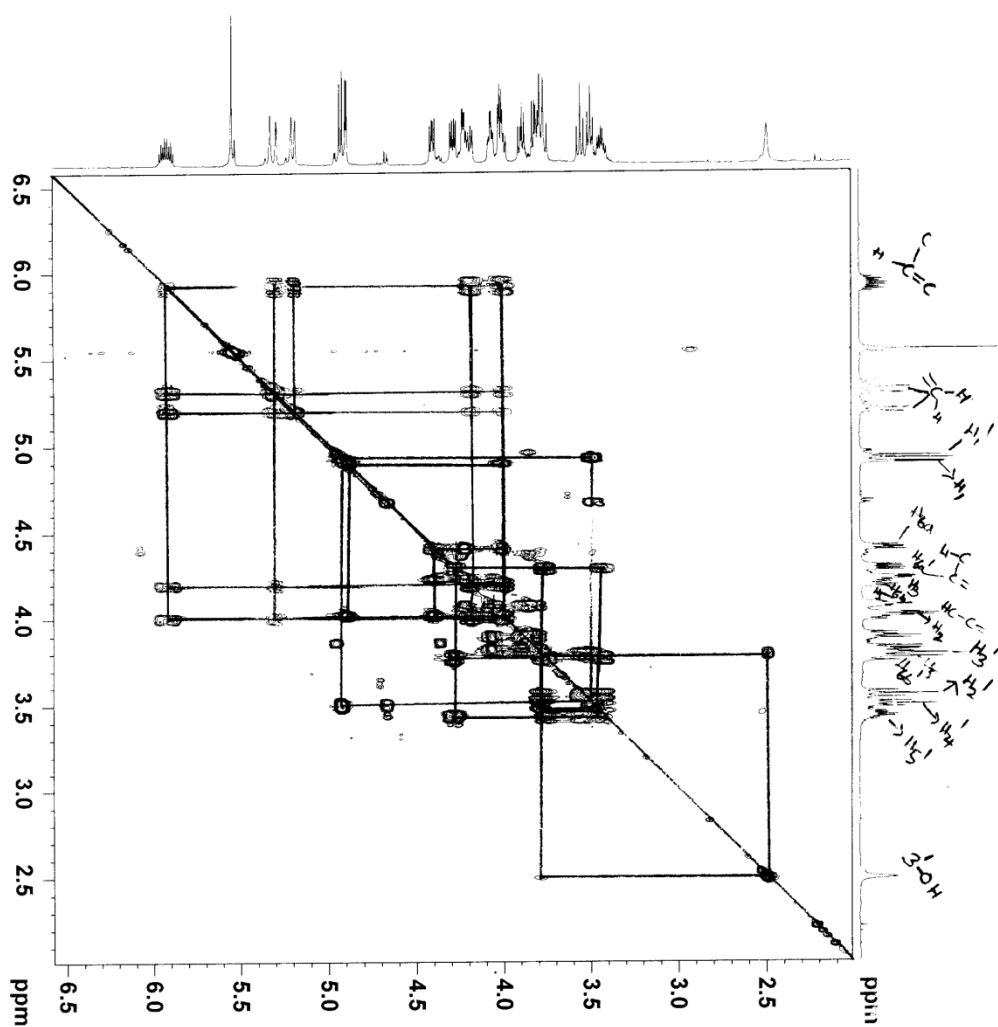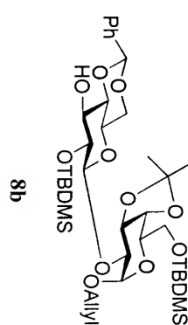

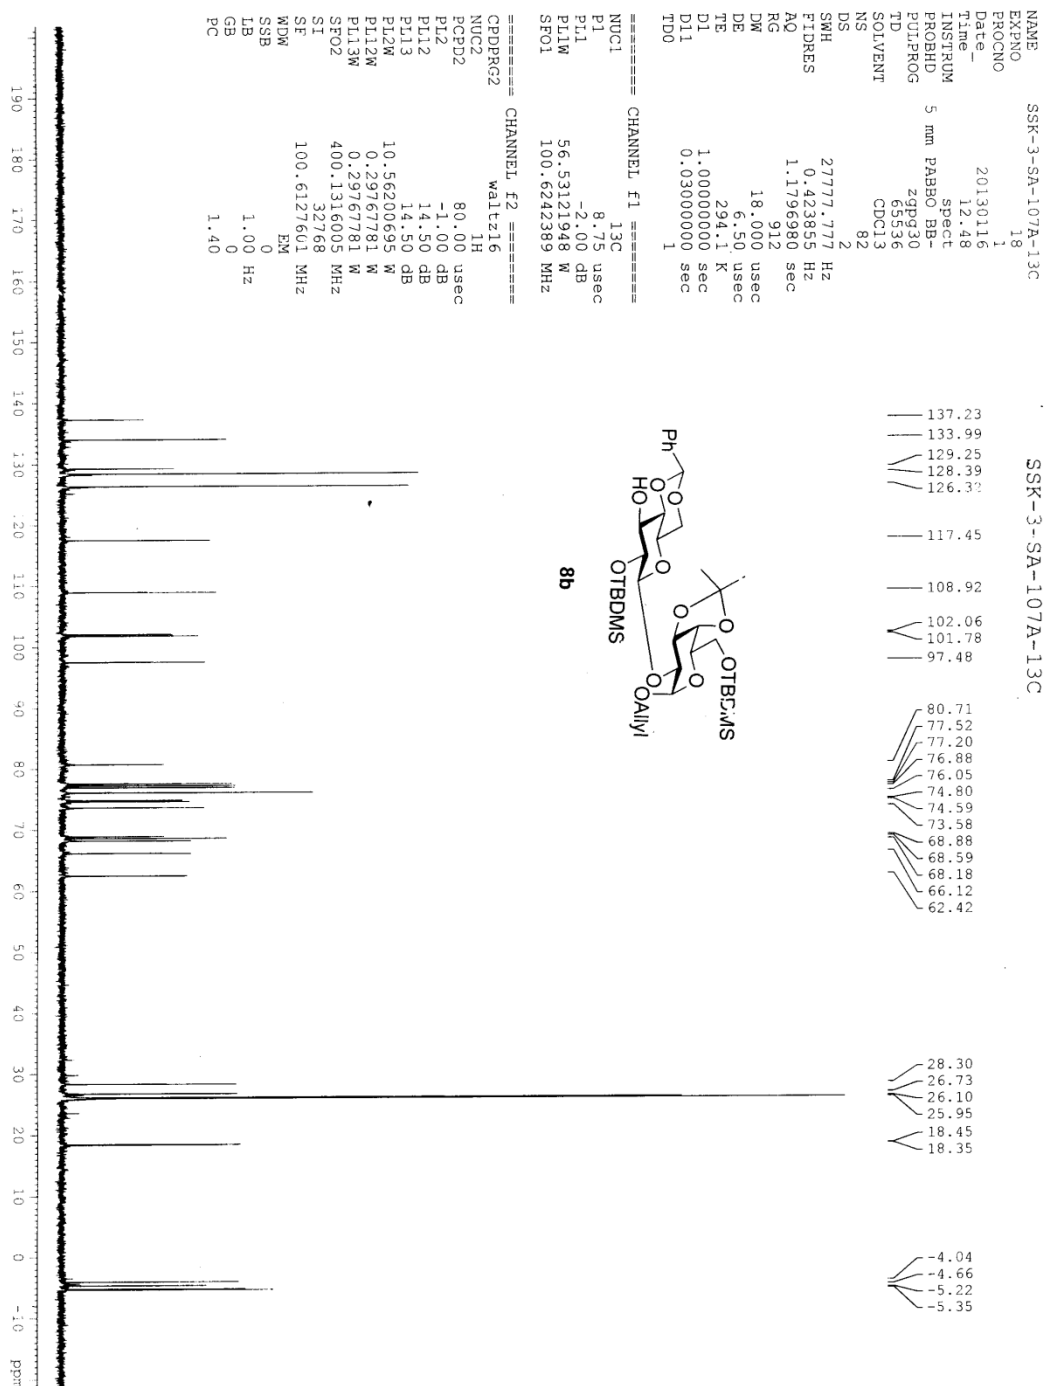



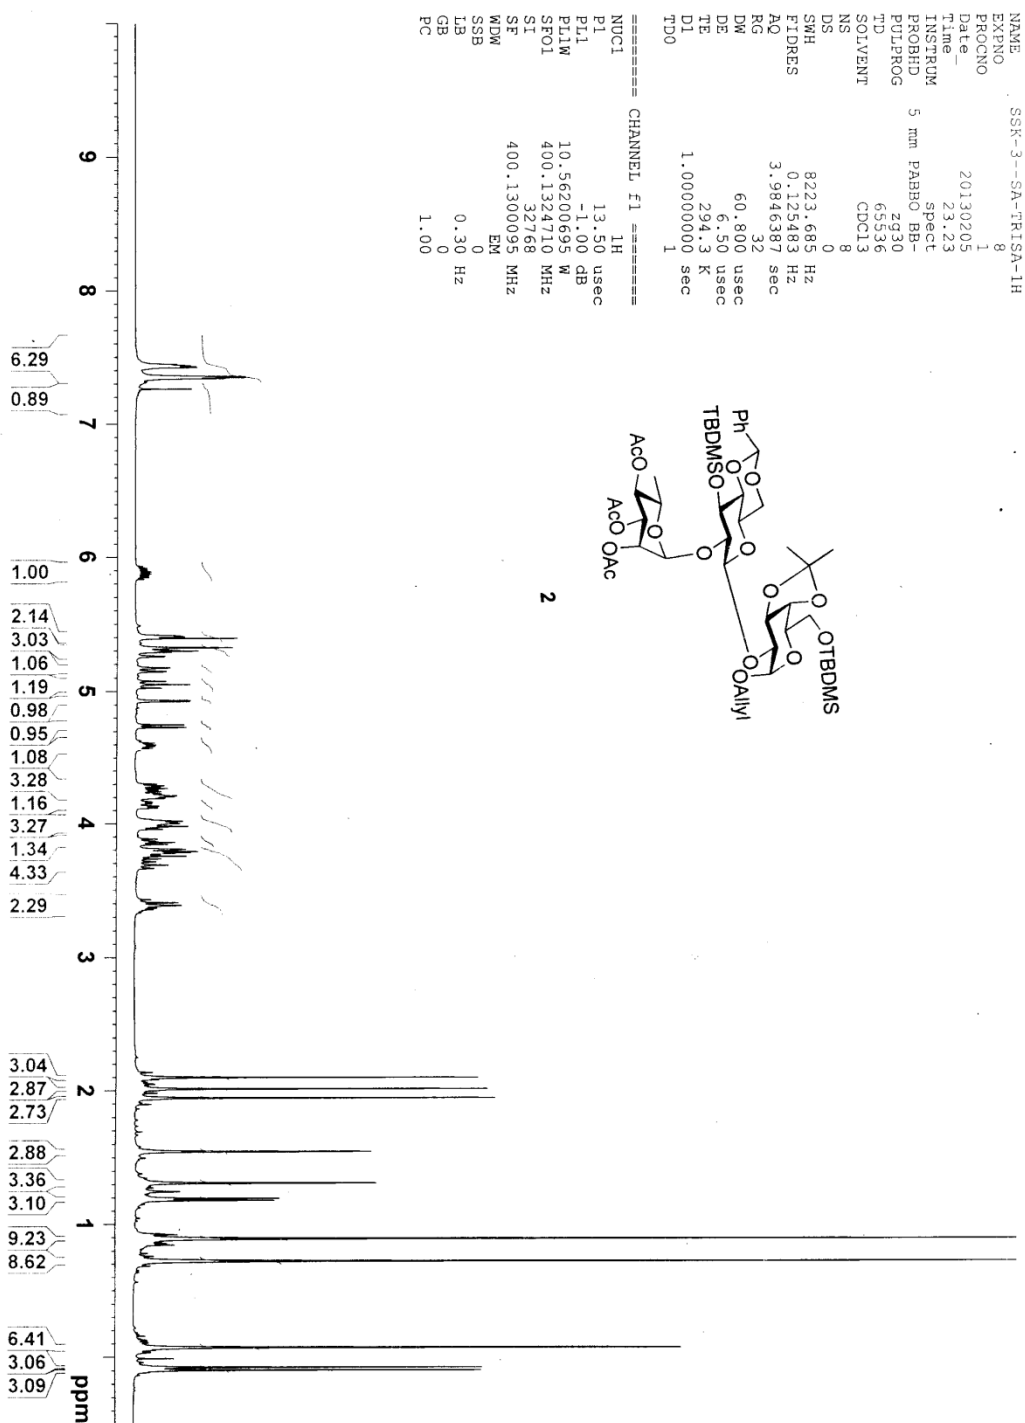

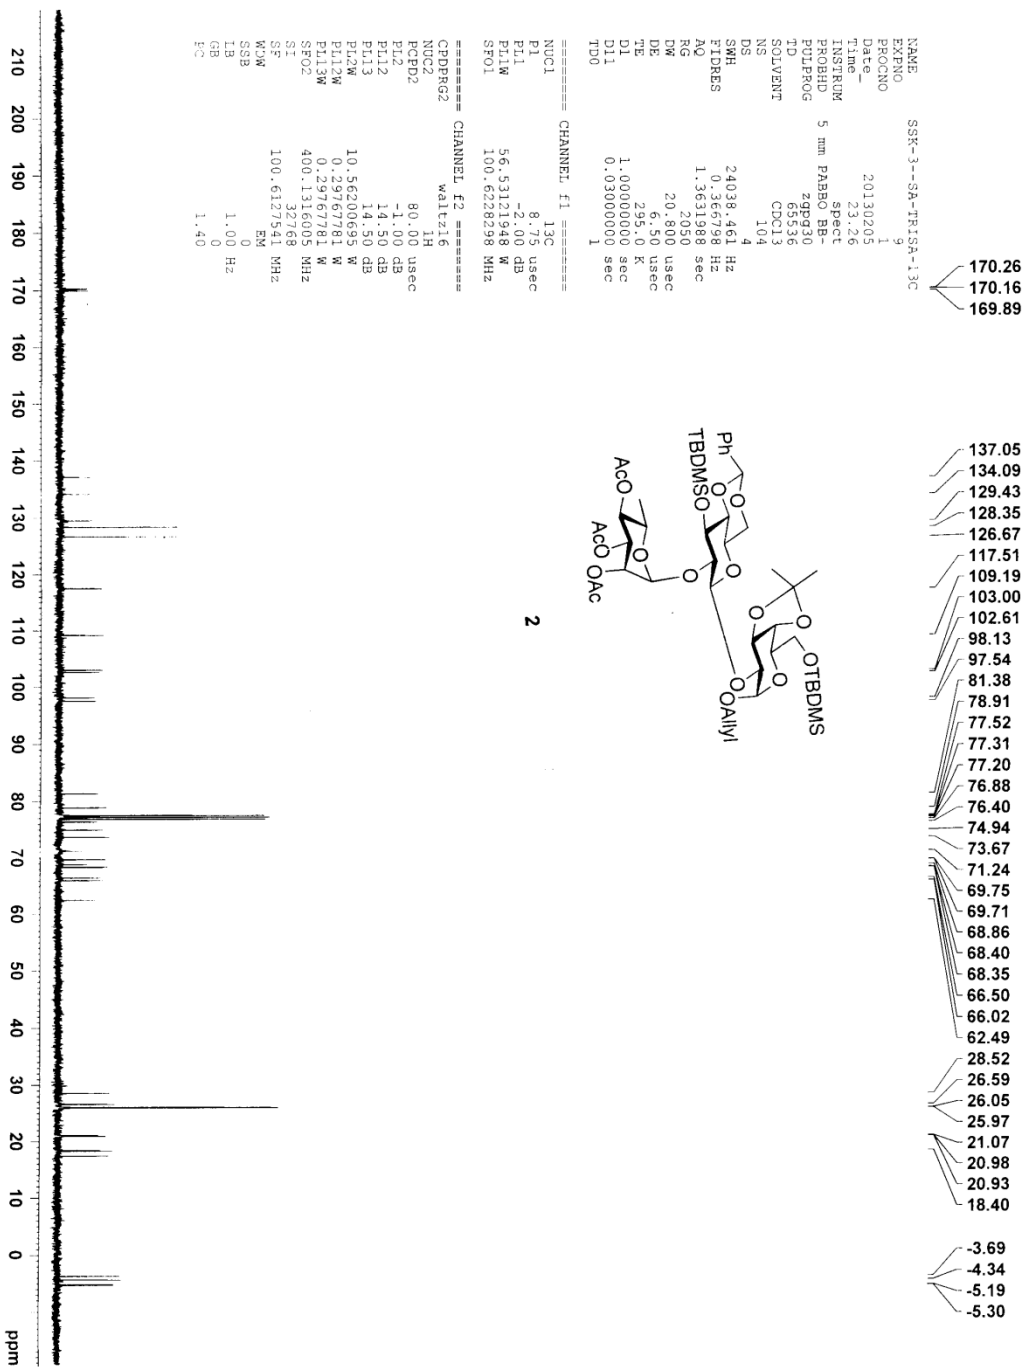

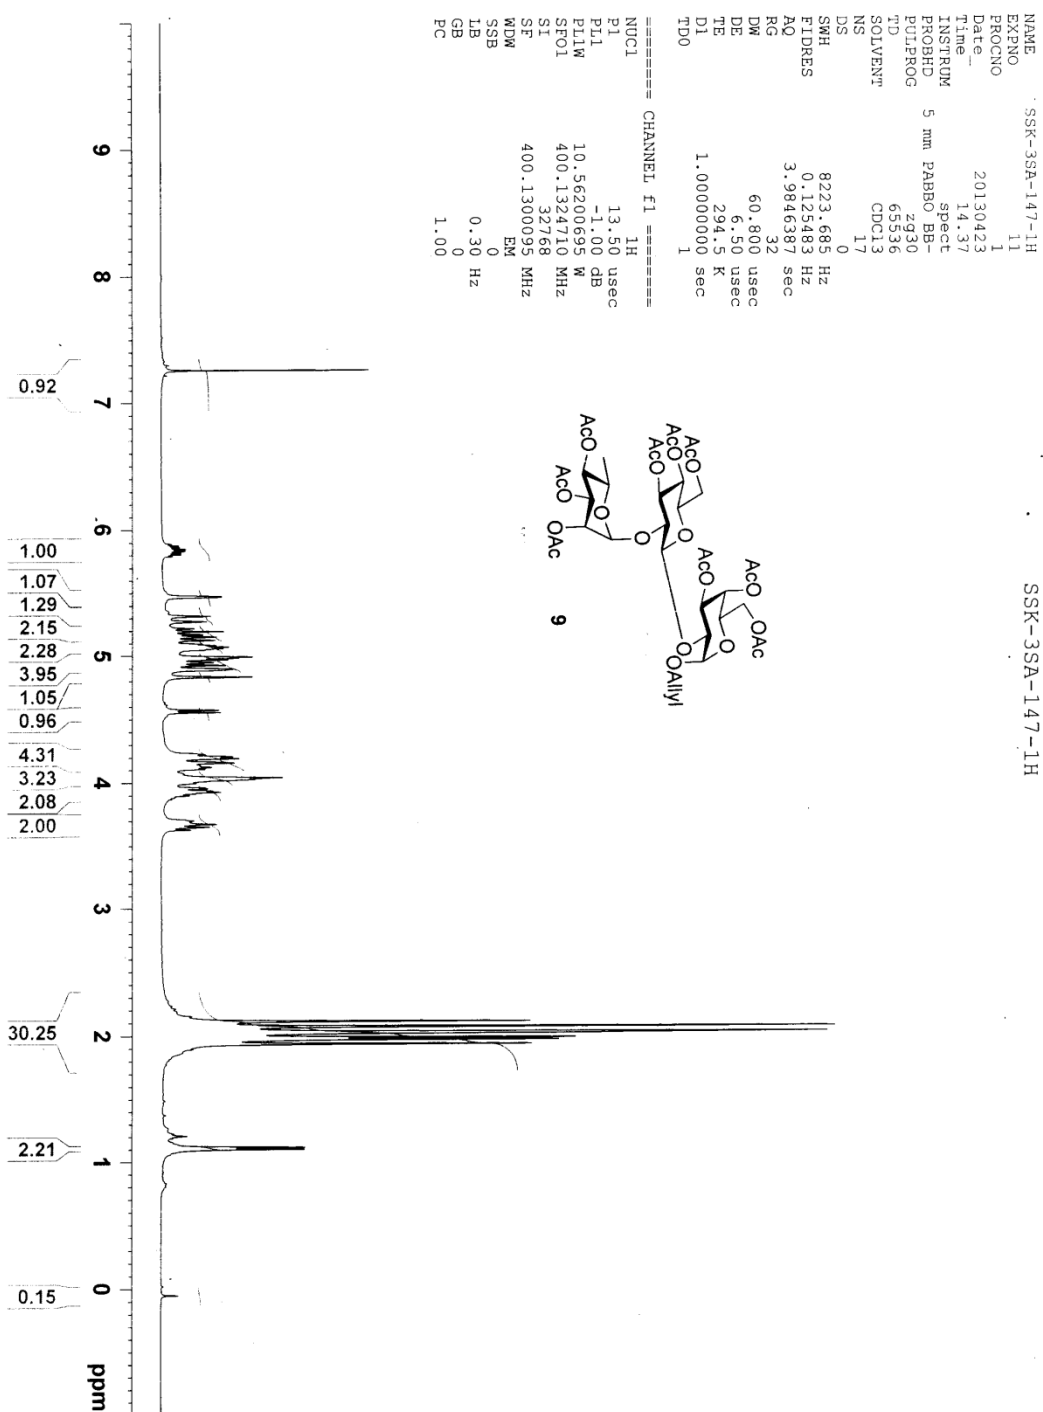

SSK-3-SA-147-13C

170.56  
 170.49  
 170.39  
 170.30  
 170.24  
 170.17  
 169.86  
 169.79

133.68  
 117.32

101.76  
 98.46  
 98.09  
 98.09  
 77.55  
 77.40  
 77.20  
 76.88  
 76.63  
 74.46  
 73.25  
 71.72  
 70.72  
 70.42  
 69.34  
 69.07  
 68.89  
 68.31  
 68.23  
 66.99  
 66.24  
 61.82  
 61.71

20.96  
 20.87  
 20.81  
 20.78  
 20.74  
 20.71  
 20.67  
 16.82

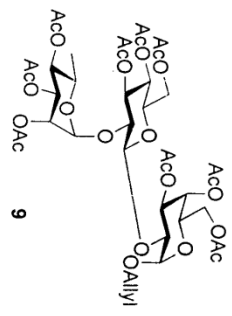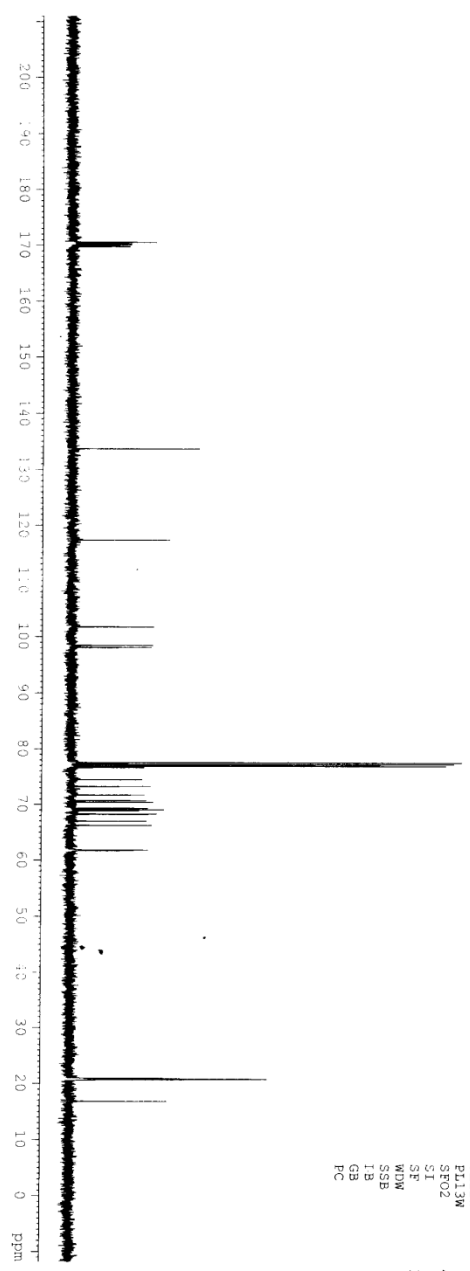

```

NAME SSK-3-SA-147-13C
EXPNO 1
PROCNO 1
Date_ 20130425
Time 15.22
INSTRUM spect
PROBHD 5 mm PABBO BB-
PULPROG zgpg30
TD 65536
SOLVENT CDCl3
NS 106
DS 4
SWH 27773.777 Hz
FIDRES 0.423855 Hz
AQ 1.1756980 sec
RG 912
DE 18.000 usec
TE 294.9 K
D1 1.00000000 sec
D11 0.03000000 sec
TD0 1

===== CHANNEL f1 =====
NUC1 13C
P1 8.75 usec
PL1 -2.00 dB
PULW 56.53121948 W
SFO1 100.6242389 MHz

===== CHANNEL f2 =====
CPDPRG2 waltz16
NUC2 13C
PCPD2 90.00 usec
PL2 -1.00 dB
PL12 14.50 dB
PL13 14.50 dB
PL2W 10.56200695 W
PL12W 0.29787781 W
PL13W 0.29787781 W
SFO2 400.1316005 MHz
SI 32768
SF 100.6127566 MHz
WDW EM
SSB 0
IB 1.00 Hz
GB 0
PC 1.40
    
```

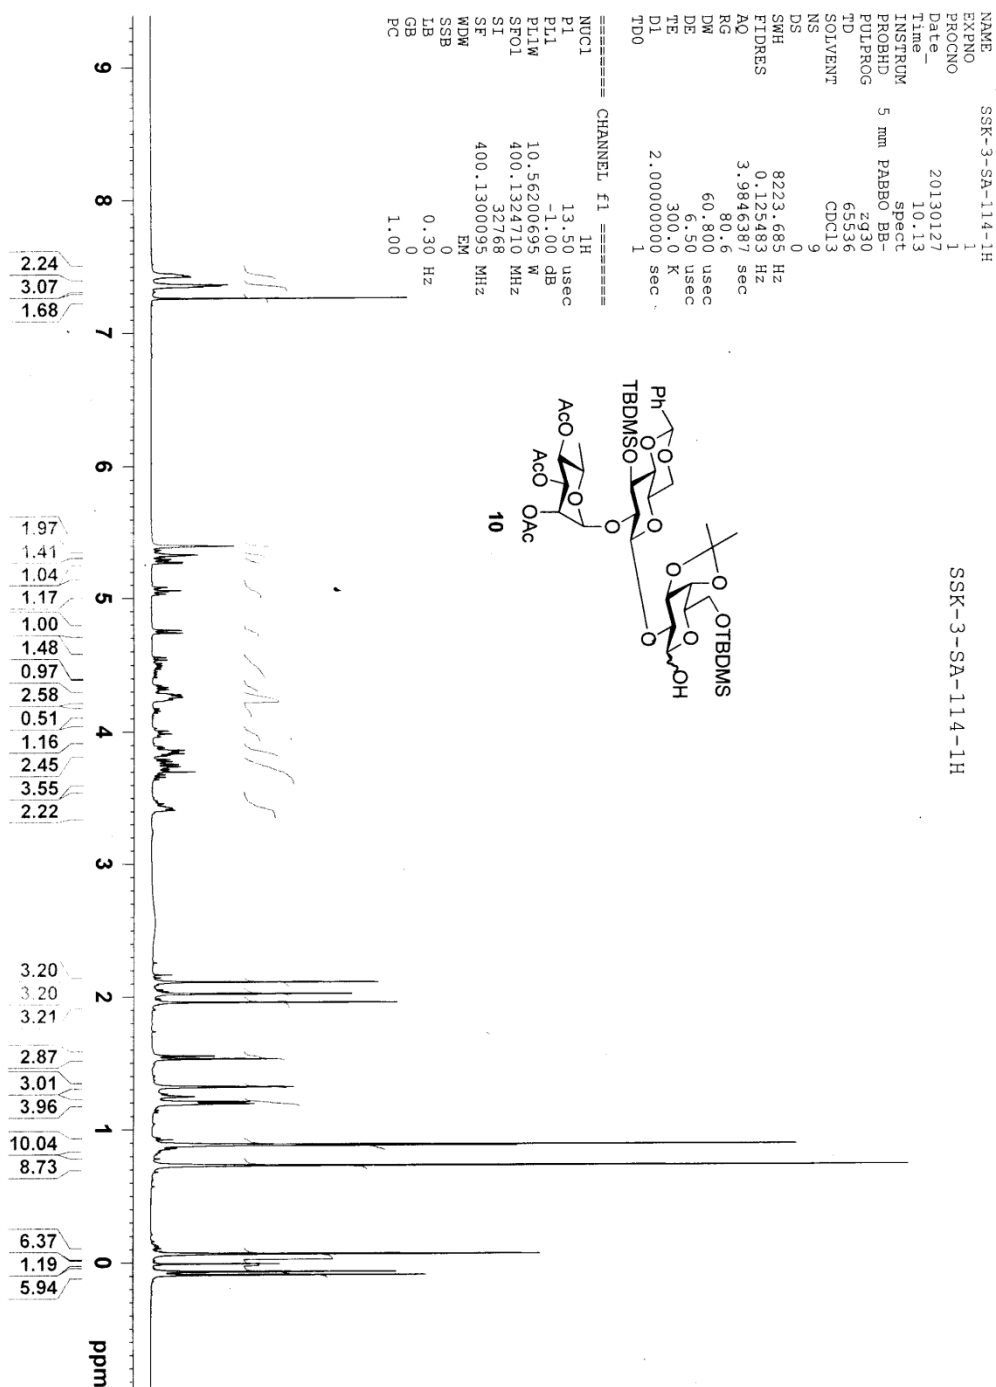

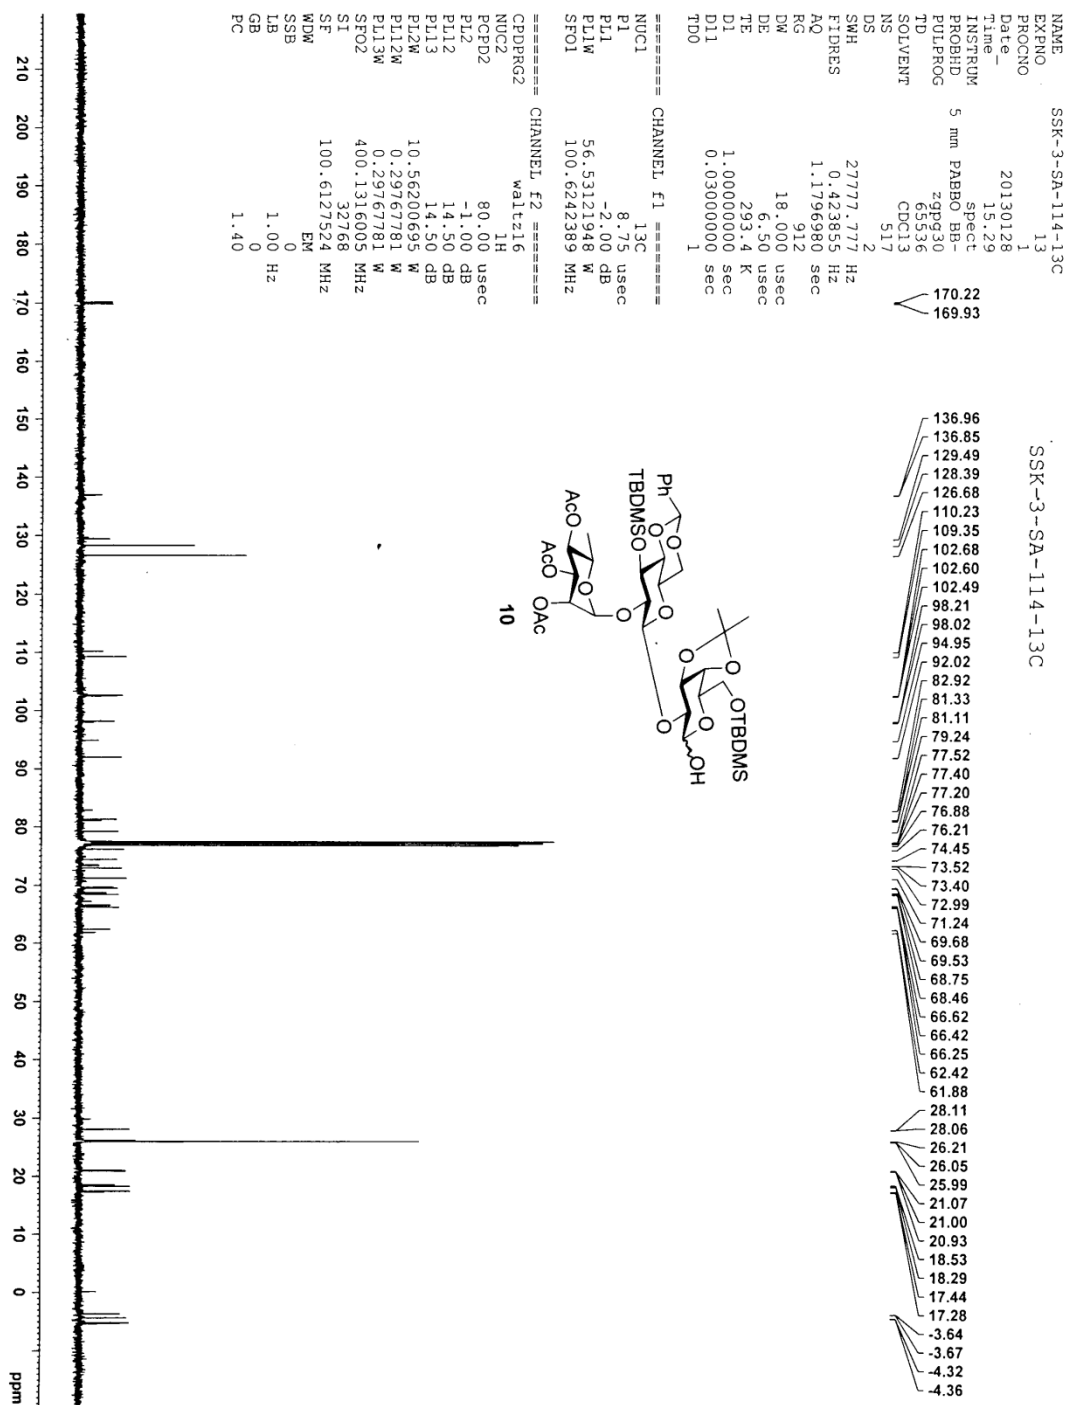

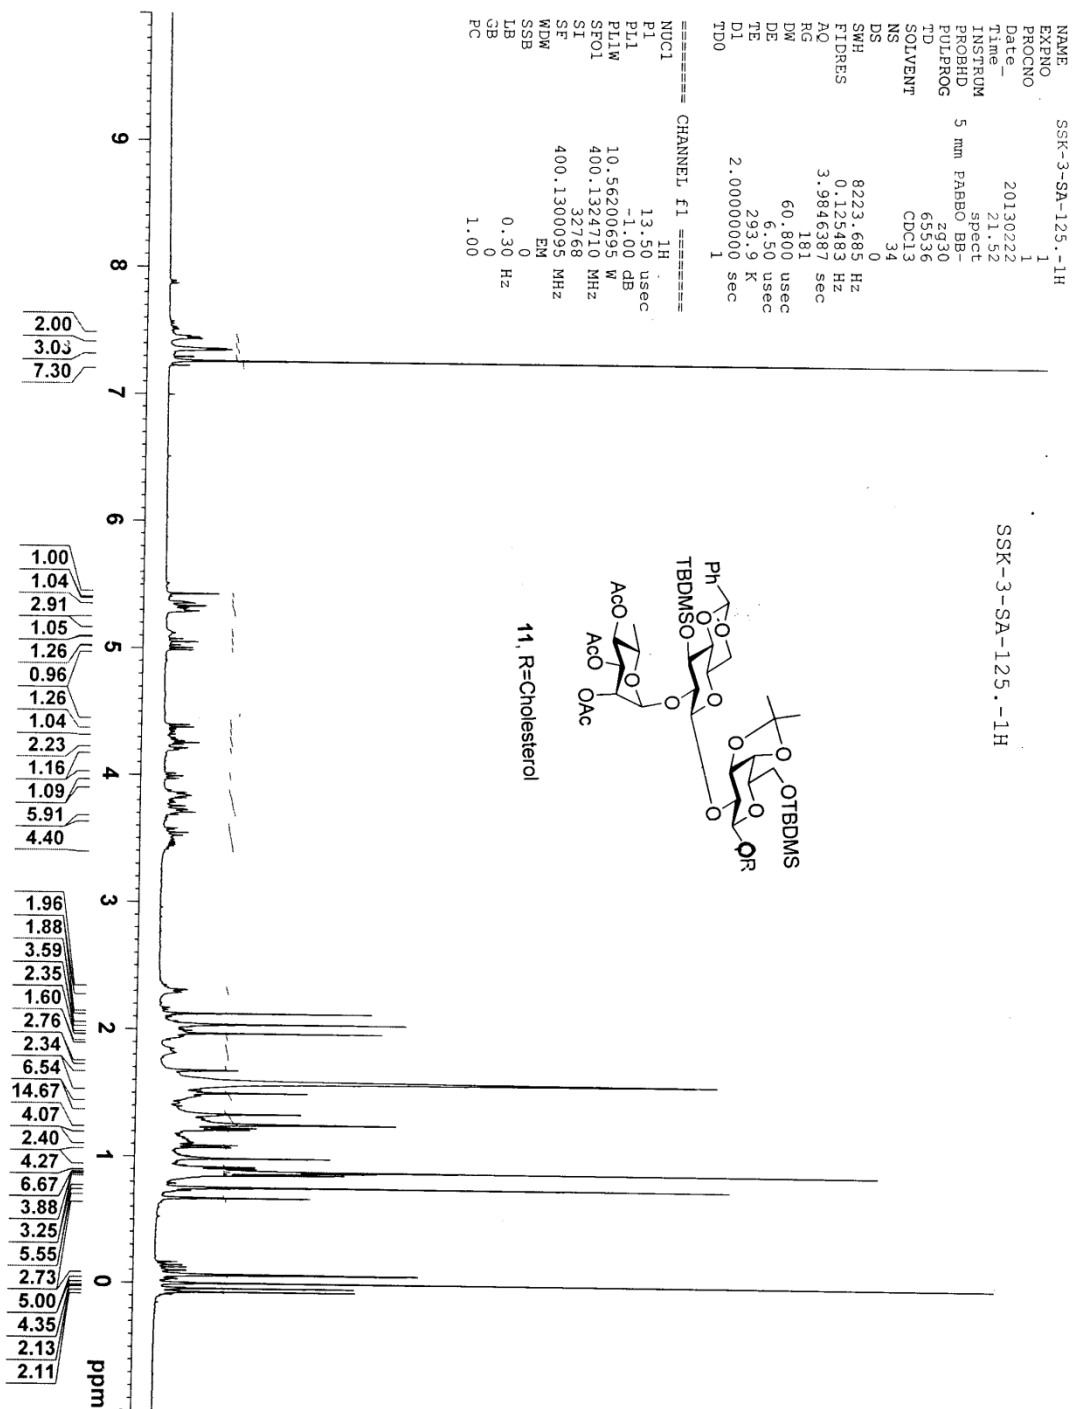

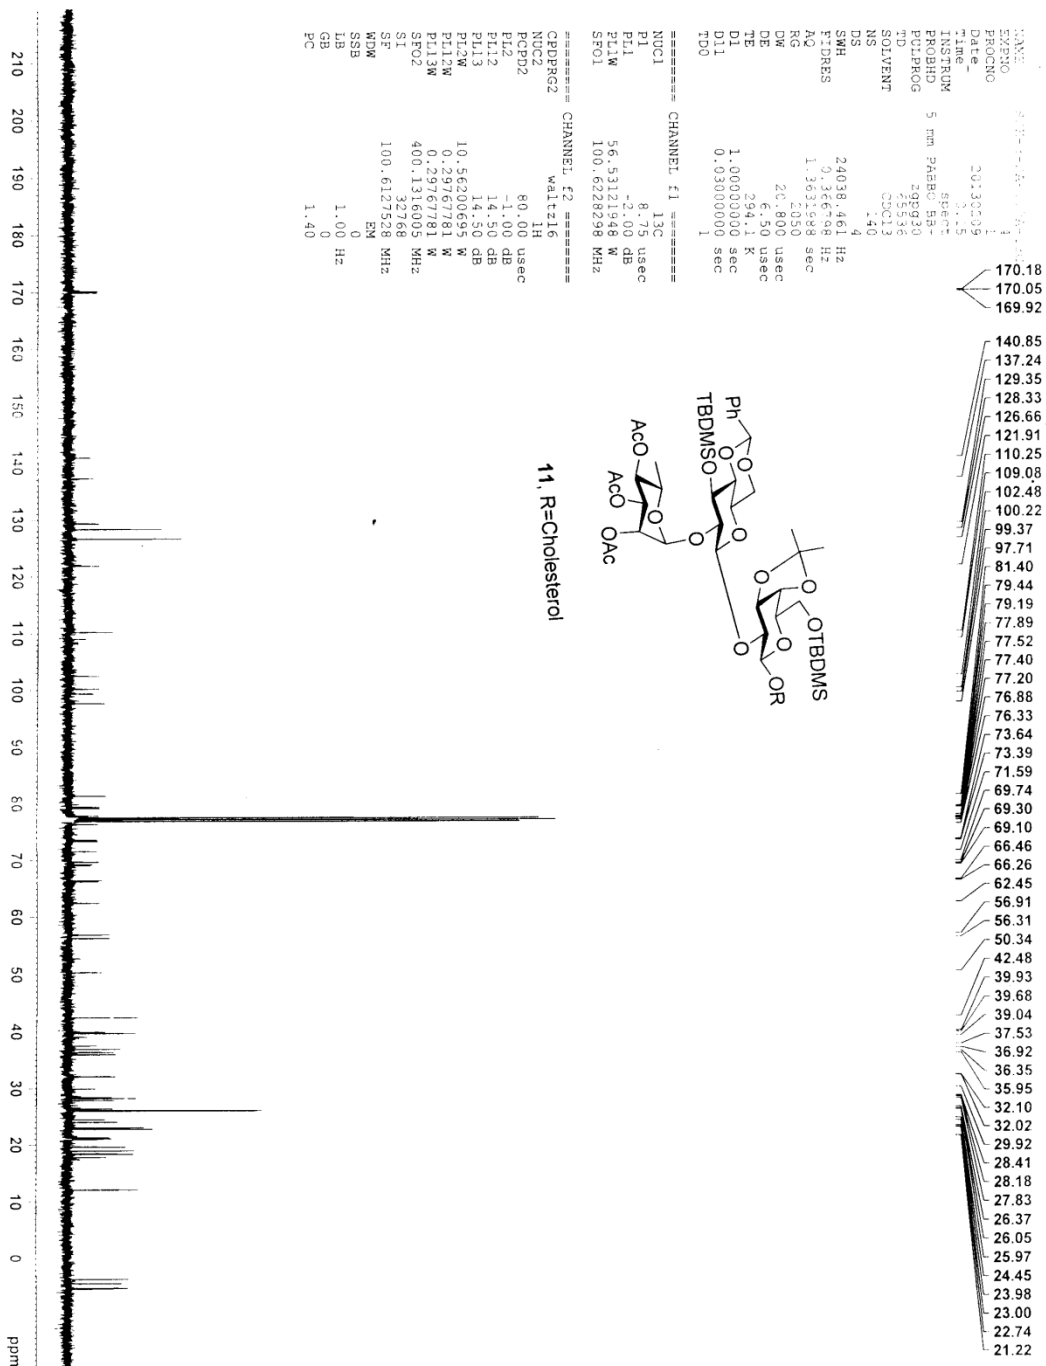



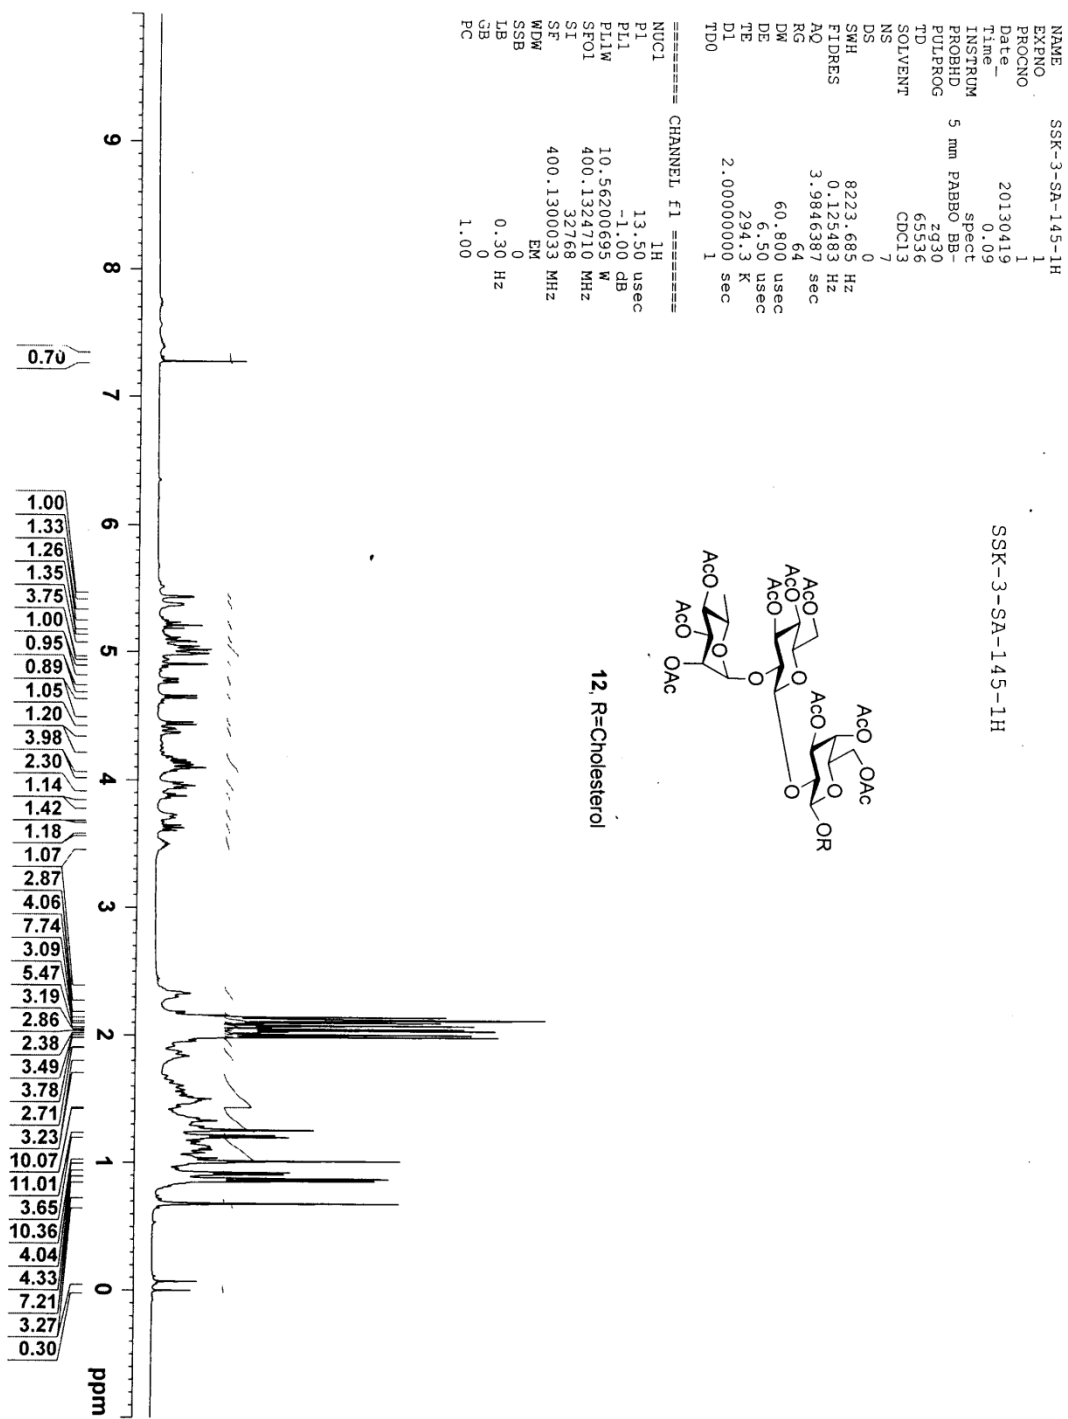

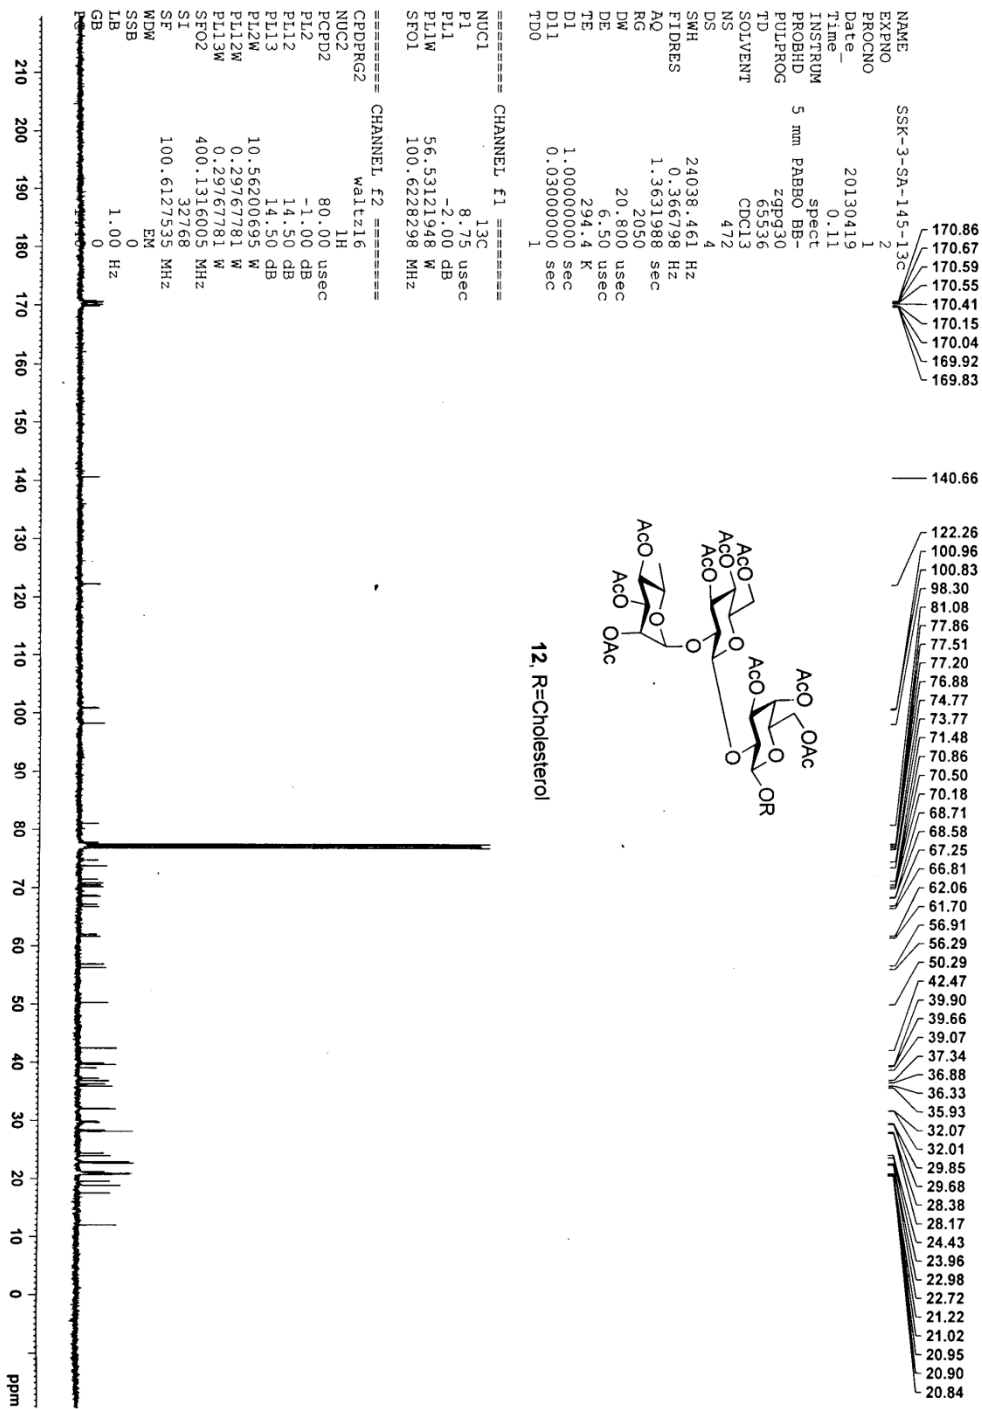

SSK-3-SA-135-1H

Current Data Parameters  
NAME SSK-3-SA-135-1H  
EXPNO 10  
PROCNO 1

F2 - Acquisition Parameters

Date\_ 20131211  
Time 15.24  
INSTRUM spect  
PROBHD 5 mm PABBO BB/  
PULPROG zg30  
TD 65536  
SOLVENT MeOD  
NS 8  
DS 0  
SMH 10000.000 Hz  
FIDPRES 0.152588 Hz  
AQ 3.2767999 sec  
RG 69.35  
DW 50.000 usec  
DE 6.50 usec  
TE 295.5 K  
D1 1.00000000 sec  
TD0 1

==== CHANNEL f1 =====  
SF01 500.1330885 MHz  
NUC1 1H  
P1 13.00 usec  
PLM1 13.00000000 W

F2 - Processing parameters  
SI 65536  
SF 500.1300099 MHz  
MDW 0  
SSB 0  
LB 0.30 Hz  
GB 0  
PC 1.00

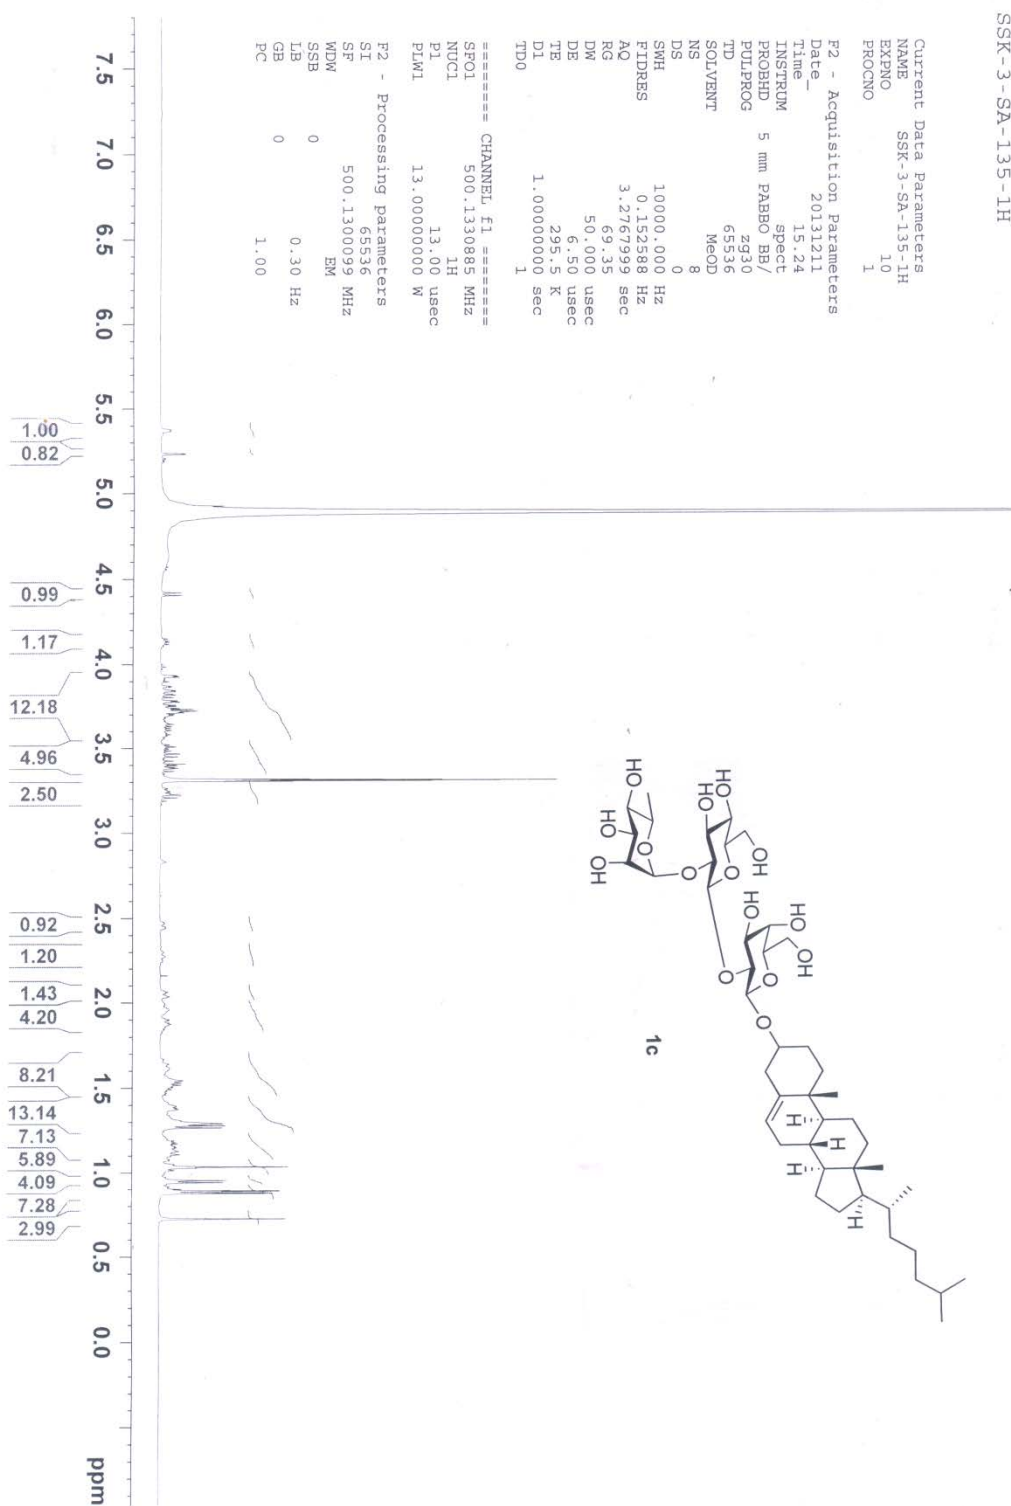

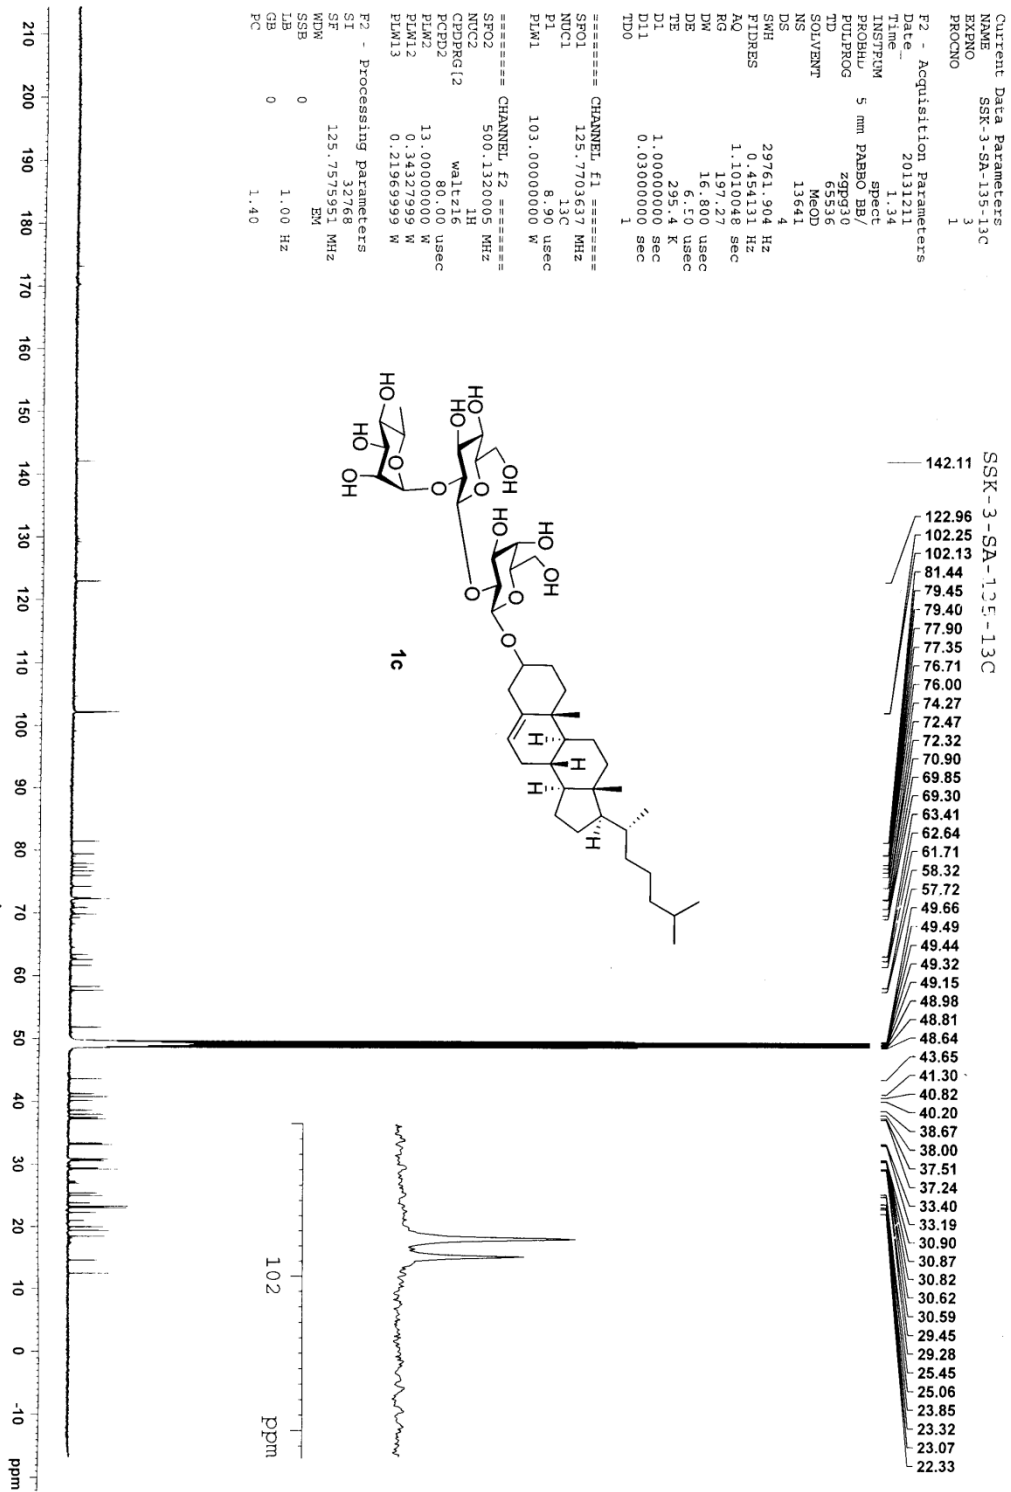

Indian Institute of Technology (B)

**Analysis Info**  
 Analysis Name D:\Data\DEC-13\SSK-SA-135A.d  
 Method Tune\_pos\_Standard\_NAI\_1000.m  
 Sample Name SSK-SA-135A  
 Comment C45H76O15  
 Acquisition Date 12/10/2013 3:08:17 PM  
 Operator DM OUT  
 Instrument maXis impact 282001.00081

**Acquisition Parameter**  
 Source Type ESI Ion Polarity Positive Set Nebulizer 0.3 Bar  
 Focus Active Set Capillary 3500 V Set Dry Heater 180 °C  
 Scan Begin 50 m/z Set End Plate Offset -500 V Set Dry Gas 4.0 l/min  
 Scan End 1000 m/z Set Collision Cell RF 400.0 Vpp Set Divert Valve Source

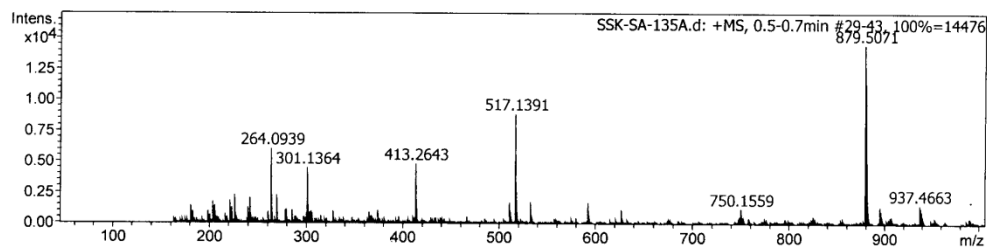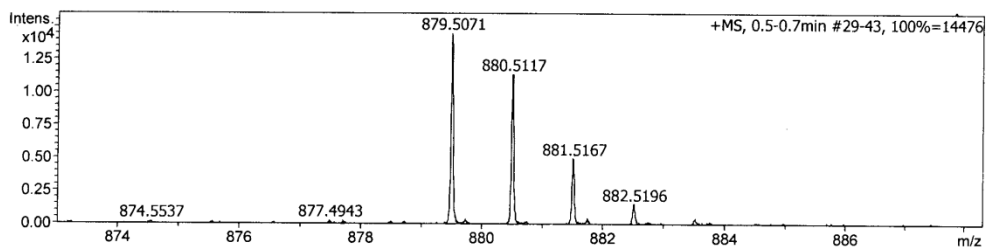

| Meas. m/z | # | Ion Formula | m/z      | err [ppm] | mSigma | # Sigma | Score  | rdb | e <sup>-</sup> Conf | N-Ruie |
|-----------|---|-------------|----------|-----------|--------|---------|--------|-----|---------------------|--------|
| 879.5071  | 1 | C45H76NaO15 | 879.5076 | -0.6      | 155.0  | 1       | 100.00 | 7.5 | even                | ok     |

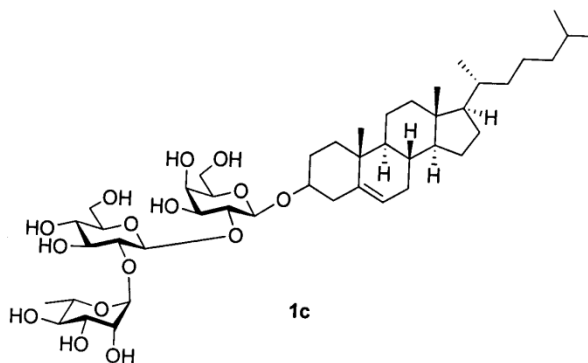

Supplement: c3ra47523a.pdf [file c3ra47523a.pdf]
